# Supplementary material for: Scarcity of autoreactive human blood IgA+ memory B cells
Source: PubMed Central journal article supplement — Eur J Immunol. 2016 Aug 25;46(10):2340–51. doi: 10.1002/eji.201646446 (PMC5113776; doi:10.1002/eji.201646446), 2016-08-25
Supplement: EJI-46-2340-s002.pdf [file EJI-46-2340-s002.pdf]

# European Journal of Immunology

**Supporting Information**

**for**

**DOI 10.1002/eji.201646446**

Julie Prigent, Valérie Lorin, Ayrin Kök, Thierry Hieu, Salomé Bourgeau  
and Hugo Mouquet

**Scarcity of autoreactive human blood IgA<sup>+</sup> memory  
B cells**

# Supporting Information Fig. 1

A

| Donor | Gender | Age | ANA | ANCA | HIV | DTP | HBV | MMR | Flu |
|-------|--------|-----|-----|------|-----|-----|-----|-----|-----|
| hd1   | M      | 42  | /   | /    | /   | X   | X   | X   | nd  |
| hd2   | M      | 51  | /   | /    | /   | X   | X   | nd  | nd  |
| hd3   | F      | 51  | /   | /    | /   | X   | X   | nd  | nd  |
| hd4   | F      | 25  | /   | /    | /   | X   | X   | X   | nd  |

M, male; F, female; ANA, antinuclear antibodies; ANCA, anti-neutrophil cytoplasmic antibodies; HIV, human immunodeficiency virus status; DTP, diphtheria-tetanus-pertussis vaccine; HBV, hepatitis B virus vaccine MMR, measles-mumps-rubella vaccine; Flu, influenzae vaccine; nd, not determined.

B

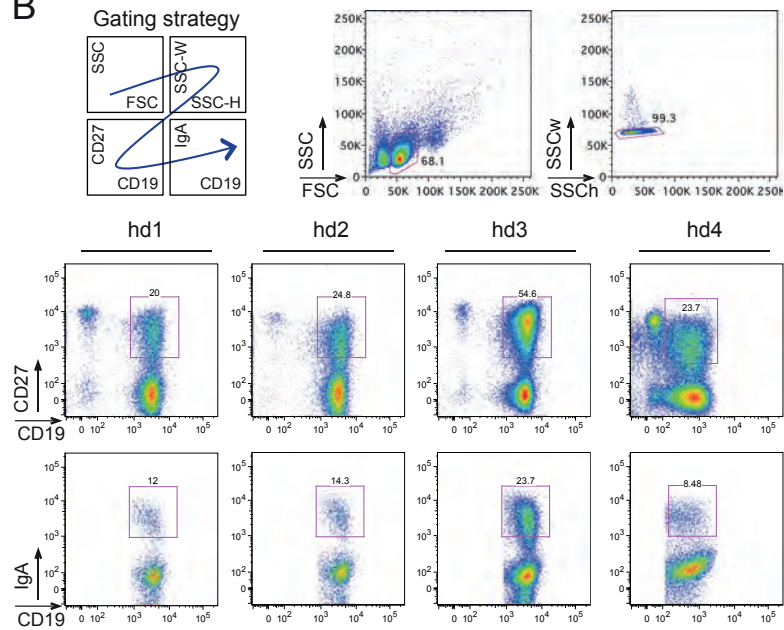

Supporting Information Fig. 1. Characteristics of healthy donors and memory B cells. (A) Table provides clinicobiological information for the four healthy donors. (B) Flow cytometry plots show the staining of donors' PBMC with anti-CD19, anti-CD27 and anti-IgA fluorescently labeled antibodies used for single B-cell sorting. IgA<sup>+</sup> memory B cells were identified as IgA<sup>+</sup>CD27<sup>+</sup>CD19<sup>+</sup> cells in the lymphocyte/singlet gate. IgG<sup>+</sup> memory B cells were identified as IgG<sup>+</sup>CD27<sup>+</sup>CD19<sup>+</sup> cells using the same strategy but with an anti-IgG antibody (data not shown).

# Supporting Information Fig. 2

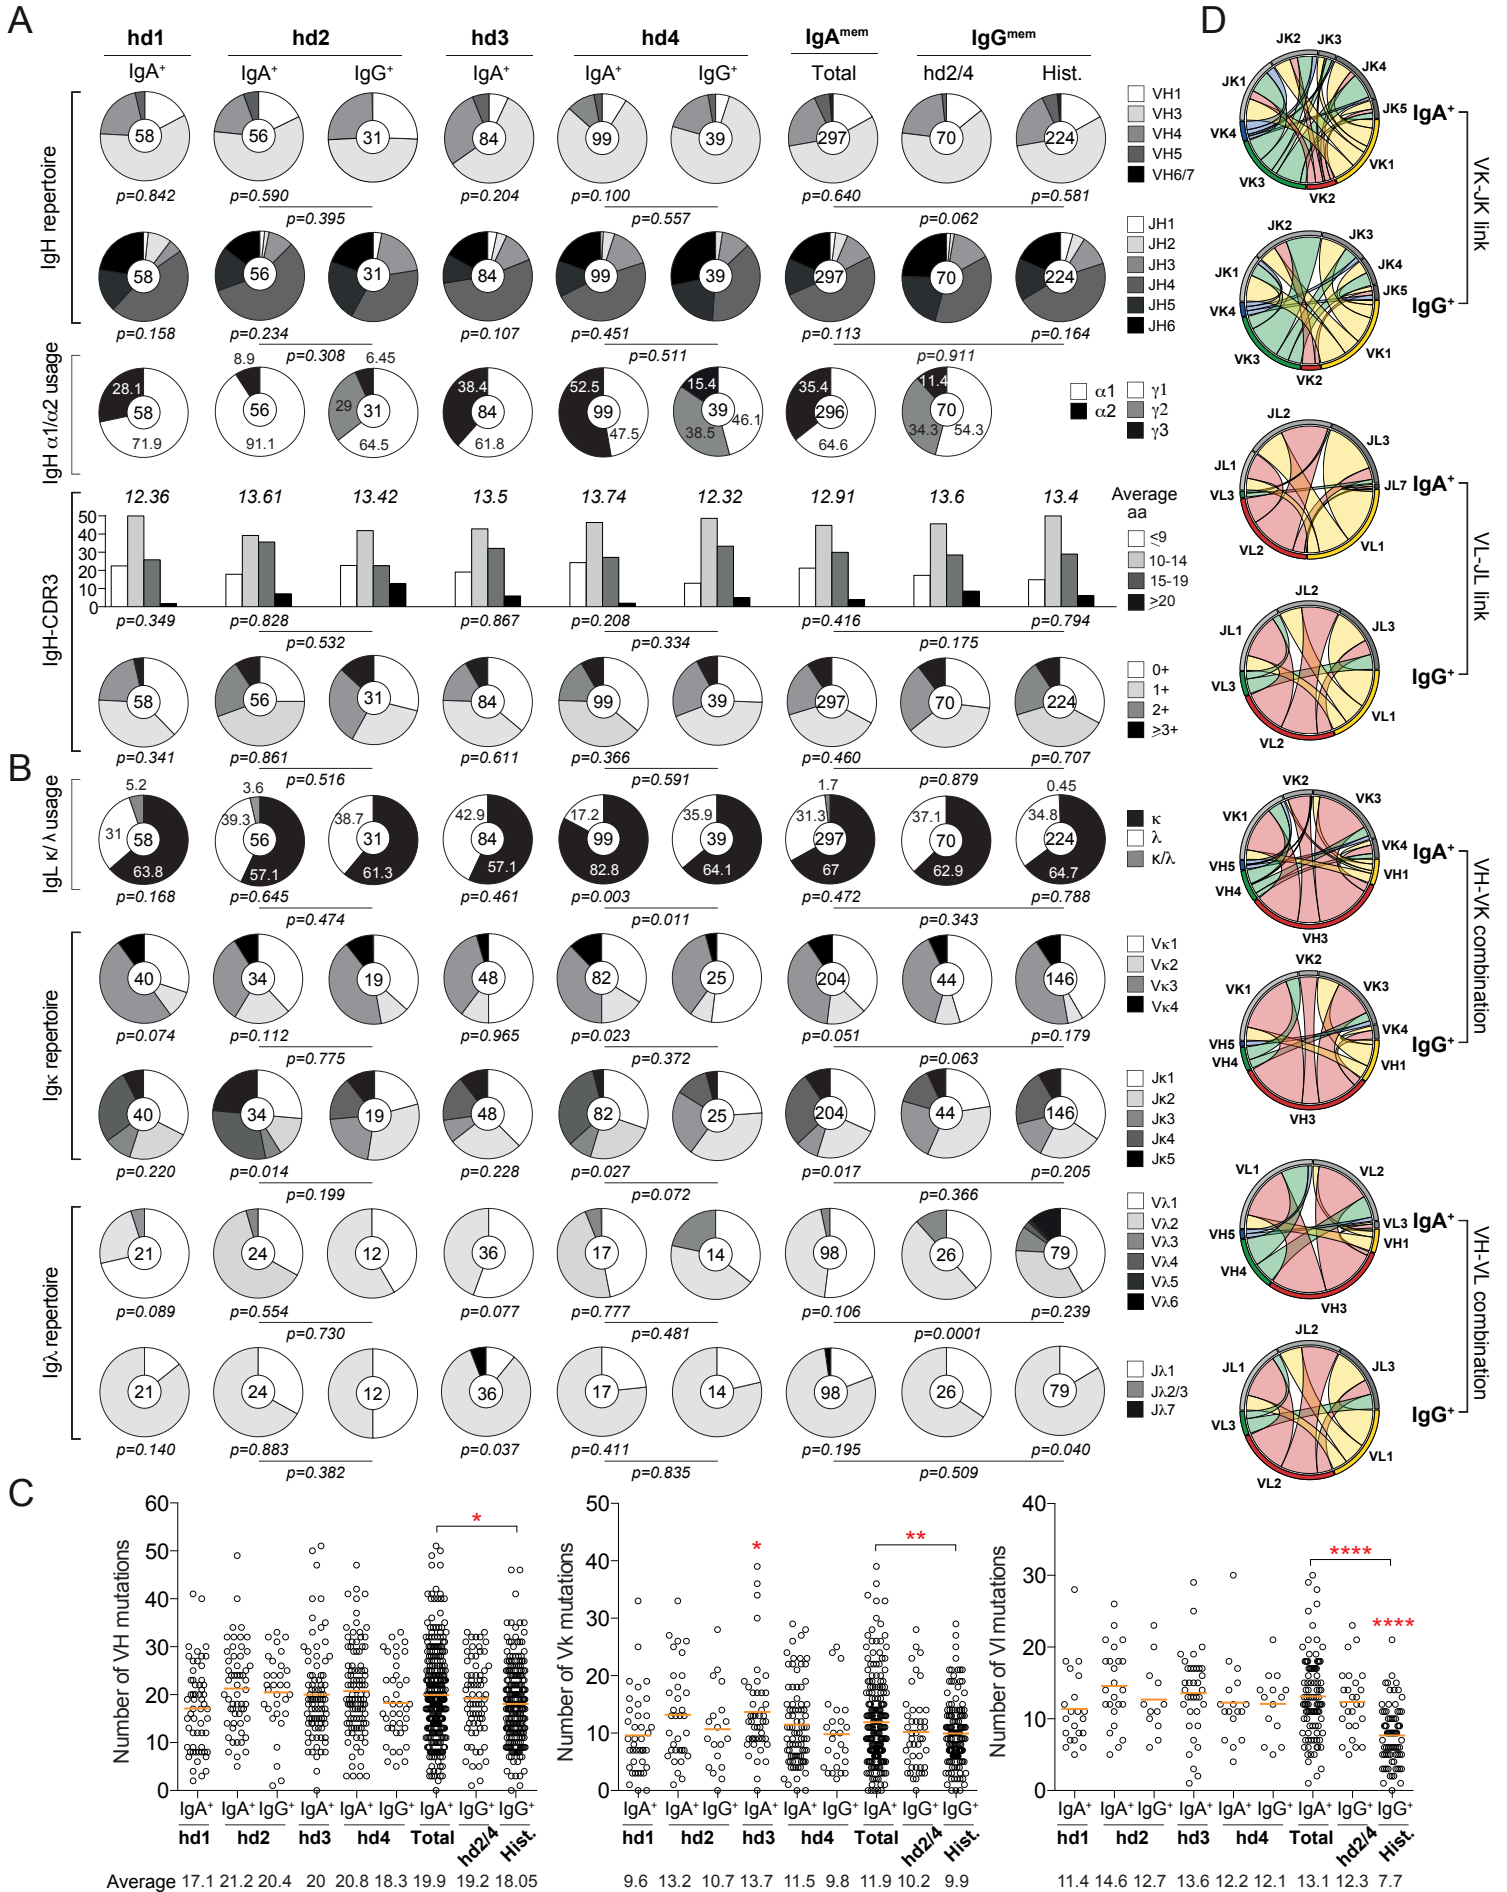

Supporting Information Fig. 2. Immunoglobulin gene repertoire of IgA<sup>+</sup> and IgG<sup>+</sup> memory B-cell antibodies. (A) IgH V and J gene usages, CDR3 length and CDR3 positive charge numbers from IgA<sup>+</sup> memory B-cell antibodies in hd1 to hd4 compared to IgG<sup>+</sup> memory B-cell antibodies from hd2 and hd4 (hd2/4), and historical data (Hist.) [15, 17]. The number of antibody sequences analyzed is indicated in the center of each pie chart. The average of IgH CDR3 length is indicated above each histogram. p-values indicated below the pie charts or histograms and the lines were calculated by comparison to the total hd2/hd4 IgG<sup>+</sup> control antibodies (hd2/4) and IgG<sup>+</sup> antibodies from the same donor (for hd2 and hd4), respectively. (B) Same as in (A) but for IgL κ/λ usage, VL and JL gene usages for Igκ and Igλ. (C) Dot plots show the number of mutations in VH, Vκ and Vλ genes in IgA<sup>+</sup> memory B cell and IgG<sup>+</sup> control antibodies as shown in (A). The average number of mutations in VH, Vκ and Vλ genes is indicated below each dot plot. The p-values were determined by comparison to IgG<sup>+</sup> memory B-cell antibodies from hd-2 and hd4 (hd2/4), and from the same donor (for hd2 and hd4) using unpaired student's t-test with Welch's correction. All comparisons were statistically non significant unless indicated with a red star. The numbers of mutations in IgA<sup>+</sup> genes were also compared with the same statistical test to historical data for IgG<sup>+</sup> memory antibodies (Hist.) [15, 17]. \*, p<0.05; \*\*, p<0.01; \*\*\*, p<0.001; \*\*\*\*, p<0.0001. (D) Circos plots comparing the frequency of VκJκ and VλJλ rearrangements, and VH-VL associations between IgA<sup>+</sup> and IgG<sup>+</sup> memory B-cell antibodies from hd1-hd4 individuals.

# Supporting Information Fig. 3

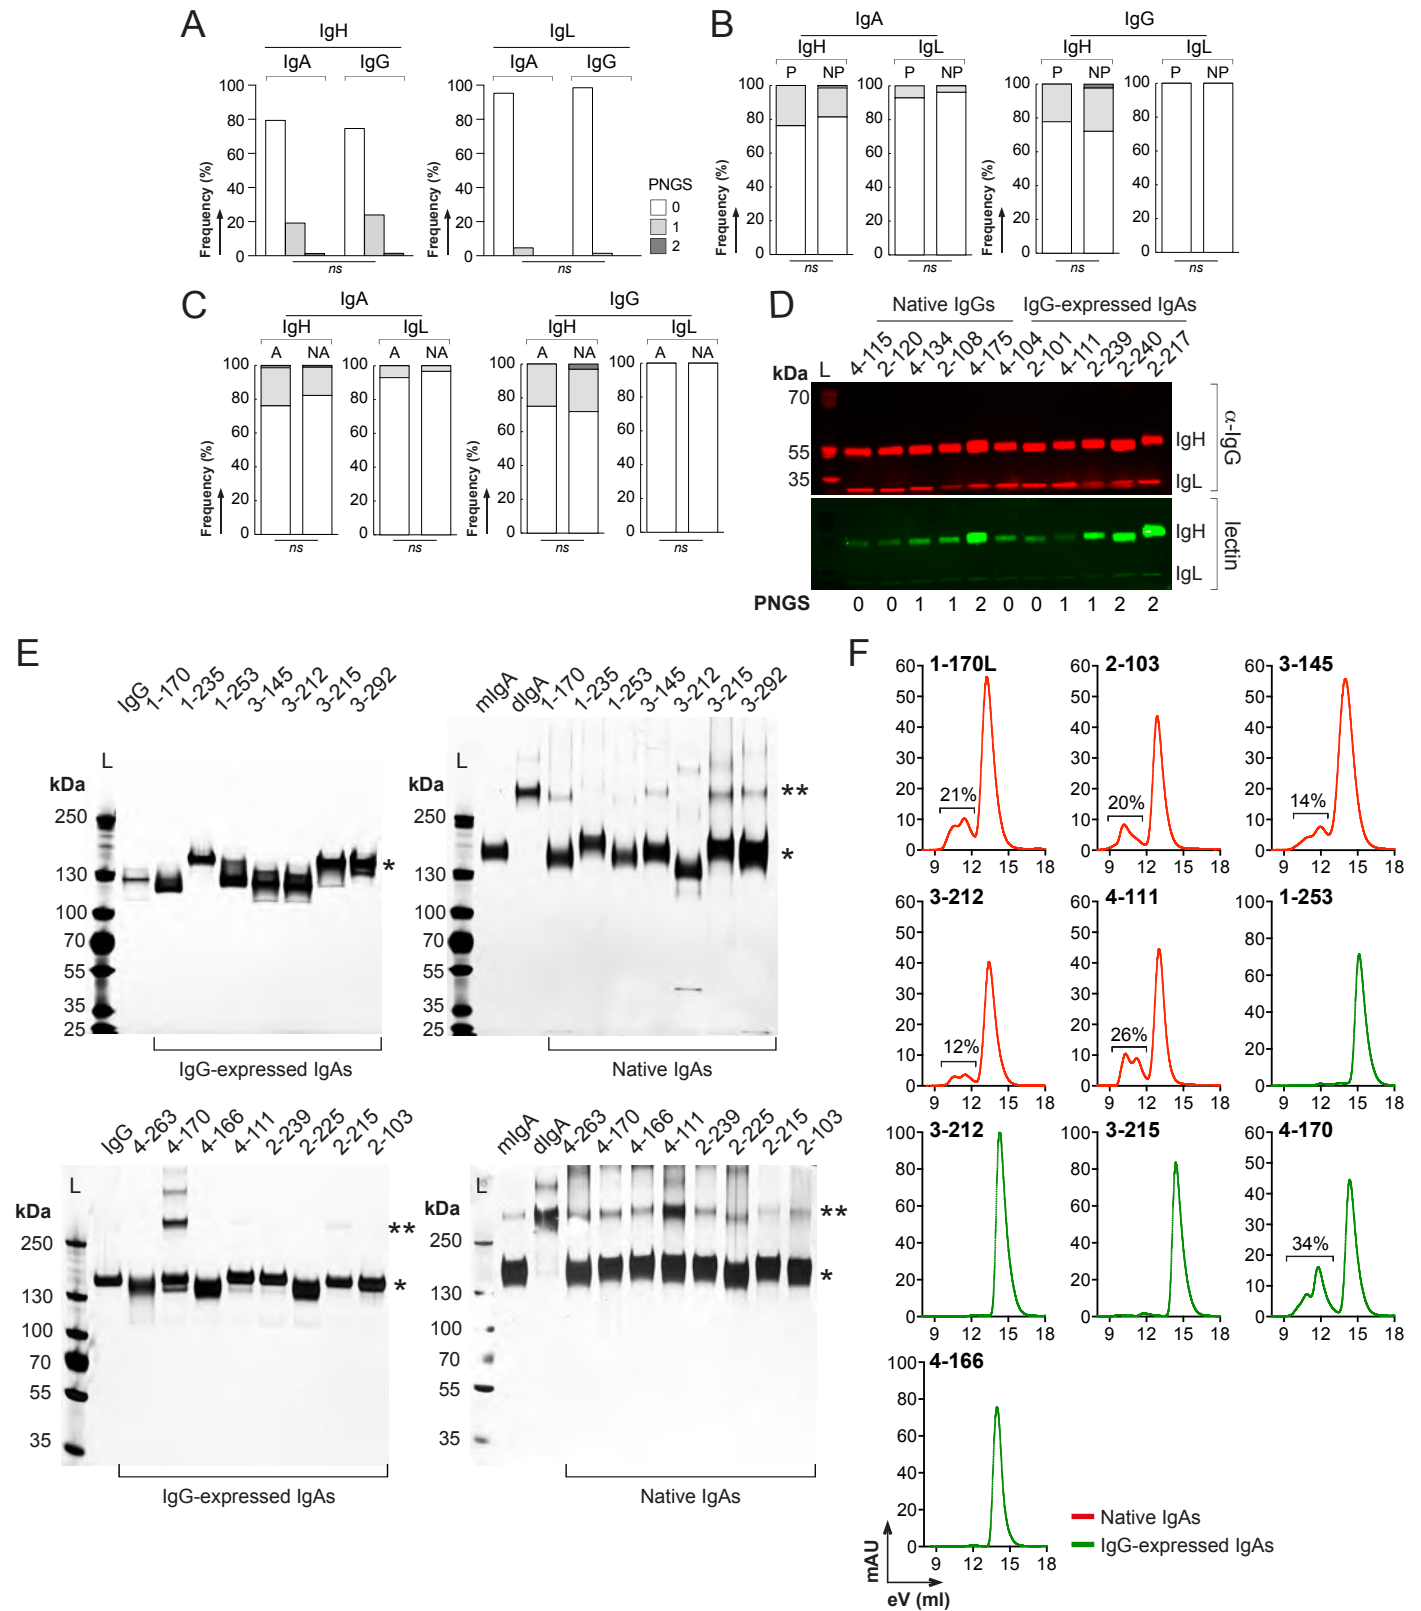

Supporting Information Fig. 3. Production of recombinant IgA and IgG memory antibodies. (A) Bar graphs comparing the frequency of putative N-glycosylation sites (PNGS) theoretically presents (defined as N-(X)-T/S) in immunoglobulin heavy- and light-chain (IgH and IgL) between IgA<sup>+</sup> and IgG<sup>+</sup> memory B-cell antibodies (n=297 and n=70, respectively). Groups were compared using Fisher's Exact test. ns, not significant. (B) same as in (A) but comparing polyreactive (P) and non polyreactive (NP) IgA<sup>+</sup> and IgG<sup>+</sup> memory B-cell antibodies (n=251 and n=61, respectively). (C) same as in (B) but comparing autoreactive (A) and non autoreactive (NA) IgA<sup>+</sup> and IgG<sup>+</sup> memory B-cell antibodies. (D) Infrared immunoblotting showing the reactivity of anti-human IgG antibodies ( $\alpha$ -IgG, red) and lectin from *Triticum vulgare* (wheat) (green) against native IgG (n=5) and IgG-expressed IgA (n=6) antibodies displaying different number of PNGS in IgH (from 0 to 2). L, protein ladder indicating molecular masses. (E) Silver-stained SDS-PAGE gel showing IgA memory antibodies produced as IgG (IgG-expressed IgAs) and native IgA molecules (n=15 for each). L, protein ladder indicating molecular masses. IgG, purified monomeric 10-1074 HIV-1 IgG antibody used as control; mIgA, purified monomeric 10-1074 HIV-1 IgA antibody used as control; dIgA, purified dimeric 10-1074 HIV-1 IgA antibody used as control [22]. \*, monomeric immunoglobulins; \*\*, dimeric immunoglobulins. (F) FPLC chromatogram showing the protein distribution (monomers and dimers) of the purified IgA memory antibodies produced as native IgA (red) and IgG (IgG-expressed IgAs, green) molecules (n=5 for each) after size exclusion chromatography (SEC). The x axis shows the elution volume (eV) required to obtain the values of absorption units at 280 nm (mAU) indicated on the y axis. The proportion of dimeric/multimeric immunoglobulins is indicated above the corresponding SEC pic.

Supplementary Table 1. Immunoglobulin gene repertoire and reactivity of IgA+ and IgG+ memory B-cell antibodies.

hd1 - IgA memory antibodies

| mAb name | VH   | DH             | JH (-) | Heavy chain |                          |        |      |      |       |     | Light chain |            |      |              |         | Polyreactivity |    |       |         |     |      |       |    |
|----------|------|----------------|--------|-------------|--------------------------|--------|------|------|-------|-----|-------------|------------|------|--------------|---------|----------------|----|-------|---------|-----|------|-------|----|
|          |      |                |        | CDR3 (aa)   | (+)                      | Length | Vmut | PNGS | α1/α2 | k/λ | Vk/λ        | Jk/λ       | CDR3 | Length       | Vk/λmut | PNGS           | κH | dsDNA | Insulin | LPS | Poly | HEP-2 |    |
| 1-117    | 3-23 | 2-15/-21       | 6      | 1           | RVAIRLGGNAYGMVD          | 2      | 15   | 30   | 0     | α2  | k           | 2-28       | 5    | MQALKGFPIT   | 9       | 10             | 1  | X     | /       | X   | X    | X     | X  |
| 1-122    | 3-23 | 2-15/5-12/3-22 | 4      | 2           | RDVRSQGHTFDY             | 3      | 12   | 13   | 0     | α1  | k           | 3-11       | 4    | QQRSSWPTT    | 9       | 7              | 0  | /     | /       | /   | /    | /     | /  |
| 1-134    | 4-31 | 2-2            | 4      | 1           | RTSRYFFDY                | 2      | 10   | 12   | 1     | α1  | λ           | 1-40       | 2/3  | QSYDSSLSGPPV | 12      | 11             | 0  | /     | /       | /   | /    | /     | /  |
| 1-143    | 3-23 | 1-26           | 6      | 3           | EVGGGRWYVMDV             | 1      | 14   | 25   | 0     | α1  | λ           | 1-47       | 2/3  | AWDDRLSLVVA  | 11      | 17             | 0  | /     | /       | /   | /    | /     | /  |
| 1-145    | 3-48 | 6-6/-13        | 4      | 2           | DAMVVKFDS                | 0      | 9    | 23   | 0     | α2  | λ           | 2-14       | 2    | TSYTRSLVI    | 10      | 8              | 0  | /     | /       | /   | /    | /     | X  |
| 1-146    | 1-8  | 3-3/-10        | 6      | 1           | AGVSYVGMVD               | 0      | 11   | 30   | 0     | α1  | λ           | 3-21       | 3    | QVWDSSTELRV  | 11      | 11             | 0  | /     | /       | /   | /    | /     | /  |
| 1-155    | 4-61 | 4-11/3-3       | 4      | 1           | GVGTTNFEY                | 0      | 9    | 18   | 0     | α2  | k           | 1-39       | 4    | QCSYGLPIT    | 9       | 13             | 0  | /     | /       | /   | /    | /     | X  |
| 1-160    | 1-2  | 6-13           | 4      | 1           | GRAVLTIPACTPLFDY         | 1      | 17   | 6    | 0     | α2  | k           | 3-20       | 4    | QHYGSSPLT    | 9       | 5              | 0  | /     | /       | /   | /    | /     | /  |
| 1-168    | 3-23 | 1-26           | 4      | 1           | SQGLILGATFLPVPFDS        | 0      | 15   | 19   | 0     | α1  | λ           | 1-51       | 3    | GTWDTLSLWVM  | 11      | 10             | 0  | X     | /       | /   | /    | /     | X  |
| 1-170k   | 3-23 | 3-3            | 6      | 3           | WALLEWVVDGMDV            | 0      | 13   | 19   | 0     | ND  | k/λ         | 1-39       | 2    | QCSYSPFTT    | 9       | 0              | 0  | X     | X       | X   | X    | X     | X  |
| 1-170A   |      |                |        |             |                          |        |      |      |       |     |             |            |      |              |         |                |    |       |         |     |      |       |    |
| 1-171    | 1-46 | 6-13/2-2       | 6      | 2           | DPFRGAAAPTGHYYVGMVD      | 2      | 19   | 9    | 1     | α1  | k           | 3-20       | 2    | QQYGSQPTT    | 9       | 13             | 0  | /     | /       | /   | /    | /     | /  |
| 1-180    | 3-23 | 3-22           | 2      | 4           | DMVDYSSGLAYWFDL          | 0      | 17   | 15   | 0     | α1  | k           | 1-9        | 3    | QQLNTYPP     | 8       | 9              | 0  | /     | /       | /   | /    | /     | /  |
| 1-182    | 3-23 | 1-7            | 4      | 1           | GGSTGNYLPHFDS            | 1      | 13   | 26   | 0     | α2  | k           | 3-15       | 4    | QQYNDWPLT    | 9       | 11             | 0  | /     | /       | /   | /    | /     | /  |
| 1-193    | 4-59 | 3-16           | 5      | 3           | AEADYLSGGLDR             | 1      | 12   | 15   | 1     | α1  | k           | 4-1        | 1    | HQYKGSPPRT   | 9       | 12             | 0  | /     | /       | /   | /    | /     | /  |
| 1-194    | 1-2  | 3-3/2-15/2-21  | 4      | 2           | EAFIAQGIKISDY            | 1      | 13   | 22   | 0     | α1  | k           | 1-39/1D-39 | 1    | QQYVGFPPIT   | 9       | 25             | 0  | X     | X       | X   | X    | X     | X  |
| 1-205    | 3-23 | 3-22           | 5      | 2           | KYYSDTRHYGNWFDV          | 3      | 16   | 9    | 0     | α2  | k           | 3-15       | 1    | QQYNNWPLA    | 9       | 3              | 0  | /     | /       | /   | /    | /     | /  |
| 1-208    | 1-69 | 2-8            | 3      | 1           | YQITVGLNADFV             | 0      | 13   | 28   | 1     | α2  | k           | 1-27       | 3    | QKYDMAFFT    | 9       | 18             | 0  | X     | X       | X   | X    | X     | X  |
| 1-211    | 3-53 | 3-3/-16        | 4      | 1           | HYRGNLLEF                | 2      | 10   | 40   | 0     | α1  | k           | 1-39/1D-39 | 4    | QQSFRTPLT    | 9       | 33             | 0  | X     | X       | X   | X    | X     | X  |
| 1-212    | 1-18 | 2-2/3-3/3-16   | 4      | 1           | ALLAYTTSRVFDY            | 1      | 13   | 8    | 0     | α1  | k           | 1-39/1D-39 | 3    | QCSYSPFTT    | 9       | 8              | 0  | /     | /       | /   | /    | /     | /  |
| 1-215    | 3-30 | 3-3            | 6      | 1           | PSLAYGGTYYYAMVDV         | 0      | 15   | 20   | 0     | α1  | λ           | 1-40       | 1    | QSYDSSLSGPFV | 11      | 5              | 0  | /     | /       | /   | /    | /     | /  |
| 1-217    | 3-23 | 5-5/-18        | 5      | 1           | TGPRGGYVDS               | 1      | 10   | 17   | 0     | α1  | k           | 3-15       | 1    | HQYNNWPLT    | 9       | 3              | 0  | /     | /       | /   | /    | /     | /  |
| 1-219    | 4-59 | 6-13           | 5      | 1           | GPAAGWFDV                | 0      | 10   | 3    | 1     | α1  | k           | 3-11       | 4    | HQRSNWPLT    | 9       | 7              | 0  | /     | /       | /   | /    | /     | /  |
| 1-221    | 3-23 | 5-5/-18        | 4      | 0           | VWAMVFHY                 | 1      | 8    | 28   | 0     | α1  | k           | 3-20       | 4    | QQYGSLSFT    | 9       | 15             | 0  | /     | /       | /   | /    | /     | /  |
| 1-227    | 3-23 | 3-10           | 4      | 1           | PGSRYPAPFDY              | 2      | 12   | 9    | 0     | α2  | k           | 3-20       | 4    | QQYGSPLT     | 9       | 7              | 0  | /     | /       | /   | /    | /     | X  |
| 1-228    | 1-2  | 3-3            | 1      | 2           | GSAEWSYWGAEHFQH          | 2      | 18   | 7    | 0     | α1  | λ           | 1-44       | 2/3  | AAWDDLSGSSVV | 12      | 6              | 0  | /     | /       | /   | /    | /     | /  |
| 1-231k   | 3-48 | 5-24           | 4      | 2           | GGPKWQYNEIDY             | 1      | 13   | 7    | 0     | α2  | k/λ         | 3-15       | 1    | QQYNNRHW     | 9       | 0              | 1  | /     | /       | /   | /    | /     | X  |
| 1-231A   |      |                |        |             |                          |        |      |      |       |     |             |            |      |              |         |                |    |       |         |     |      |       |    |
| 1-232    | 3-23 | 5-12/-5/-18    | 4      | 1           | VLWTFLFDY                | 0      | 9    | 22   | 0     | α1  | k           | 3-15       | 4    | QQYNNWPLT    | 9       | 19             | 1  | ND    | ND      | ND  | ND   | ND    | ND |
| 1-234    | 5-51 | 3-3            | 6      | 2           | LDWSGYHMDV               | 1      | 10   | 8    | 0     | α1  | λ           | 1-40       | 3    | QSYDSSLSGSRV | 12      | 6              | 0  | /     | /       | /   | /    | /     | /  |
| 1-235    | 5-51 | 5-5/-18        | 6      | 2           | REGYNGFGMDV              | 1      | 12   | 8    | 0     | α1  | k           | 1-12       | 2    | QQSSSFPQN    | 9       | 7              | 0  | X     | X       | X   | X    | X     | X  |
| 1-239    | 3-74 | 1-26           | 5      | 0           | GGTPGA                   | 0      | 6    | 22   | 0     | α2  | k           | 3-15       | 2    | QQYNDWPLY    | 9       | 7              | 0  | X     | X       | X   | X    | X     | X  |
| 1-242    | 3-33 | 2-2            | 5      | 2           | DFPSRIGGYCGSINCYPYFNLFDP | 1      | 22   | 12   | 0     | α1  | λ           | 1-51       | 3    | GTWDDLSLVPV  | 11      | 11             | 0  | /     | /       | /   | /    | /     | /  |
| 1-244    | 1-46 | 3-16           | 4      | 4           | DVYNSDELNFDY             | 0      | 12   | 29   | 0     | α1  | k           | 2-28/2D-28 | 1    | MQSLQTPWT    | 9       | 5              | 0  | /     | /       | /   | /    | /     | /  |
| 1-249    | 3-9  | 4-11/-4        | 5      | 3           | DKDNSNFVSAWFDV           | 1      | 14   | 14   | 0     | α1  | k           | 3-11       | 3    | QQRSSWPTT    | 9       | 7              | 0  | /     | /       | /   | /    | /     | /  |
| 1-250    | 4-61 | 1-7            | 2      | 3           | DQLELRFPRSYWFDL          | 2      | 15   | 8    | 1     | α2  | k           | 1-39       | 2    | QQSYTKPYT    | 9       | 3              | 0  | /     | /       | /   | /    | /     | /  |
| 1-253    | 3-48 | 3-16           | 6      | 1           | GGGLYVYVGMVDV            | 0      | 12   | 20   | 0     | α1  | k           | 3-20       | 2    | QQYGNSPLYT   | 10      | 3              | 0  | X     | X       | X   | X    | X     | X  |
| 1-258k   | 3-30 | 6-13           | 4      | 2           | DGAMGRSWYGFYD            | 1      | 13   | 28   | 1     | α1  | k/λ         | 1D-8       | 1    | QQYYSFPR     | 8       | ND             | 0  | ND    | ND      | ND  | ND   | ND    | ND |
| 1-258A   |      |                |        |             |                          |        |      |      |       |     |             |            |      |              |         |                |    |       |         |     |      |       |    |
| 1-259    | 1-46 | 6-6/-13/-19    | 6      | 2           | GGTYSRPEGFYVGMVDV        | 1      | 17   | 16   | 0     | α1  | k           | 4-1        | 2    | QQYYSAPYT    | 9       | 9              | 0  | /     | /       | /   | /    | /     | /  |
| 1-266    | 3-53 | 3-10           | 3      | 2           | LLGEGAFDI                | 0      | 9    | 15   | 0     | α1  | k           | 2-28/2D-28 | 2    | MQALQTPYI    | 9       | 4              | 0  | /     | /       | /   | /    | /     | /  |
| 1-270    | 1-2  | 2-21           | 5      | 2           | VAYCATDCSRPLNWFDP        | 1      | 17   | 17   | 0     | α2  | λ           | 2-11       | 2/3  | CSYAGSSFFW   | 10      | 8              | 0  | /     | /       | /   | /    | /     | /  |
| 1-276    | 3-23 | 2-8            | 4      | 2           | DRWTTVAVMVQPAHDY         | 2      | 16   | 23   | 0     | α1  | λ           | 1-44       | 1    | AAWDDLSGLYV  | 12      | 8              | 0  | X     | /       | /   | /    | /     | /  |
| 1-281    | 4-31 | 2-21           | 4      | 2           | DCAGDCHYV                | 1      | 9    | 41   | 1     | α1  | k           | 3-20       | 1    | QQYDSSPQT    | 9       | 19             | 0  | /     | /       | /   | /    | /     | /  |
| 1-282    | 3-15 | 6-19/-25       | 4      | 2           | EBAAGVGH                 | 1      | 9    | 20   | 0     | α2  | k           | 1-5        | 1    | QEYNTYWT     | 8       | 14             | 0  | /     | /       | /   | /    | /     | /  |
| 1-284    | 3-30 | 6-13/19/-10    | 6      | 3           | DDSSVYQYGMVDV            | 0      | 14   | 27   | 0     | α1  | λ           | 1-51       | 3    | GRWRDLSLWVI  | 11      | 18             | 0  | /     | /       | /   | /    | /     | /  |
| 1-288    | 3-21 | 1-1            | 4      | 1           | VGINWSSDY                | 0      | 9    | 20   | 1     | α1  | k           | 1-9        | 1    | QQVNTYPTW    | 9       | 11             | 0  | /     | /       | /   | /    | /     | /  |
| 1-334    | 3-33 | 6-13           | 5      | 2           | DWQYSSWFDS               | 0      | 11   | 8    | 0     | α1  | λ           | 2-23       | 2/3  | CSYAGSSHMV   | 10      | 9              | 1  | /     | /       | /   | /    | /     | /  |
| 1-340    | 3-48 | 3-10           | 6      | 2           | NVDRFYNGMDV              | 1      | 12   | 27   | 0     | α1  | k           | 2-28/2D-28 | 5    | MQALQTPSIT   | 9       | 11             | 0  | /     | /       | /   | /    | /     | /  |
| 1-342    | 4-61 | 5-24           | 2      | 2           | WQLSDWYFDL               | 0      | 10   | 12   | 1     | α1  | λ           | 1-44       | 3    | AAWDDLSGWL   | 11      | 12             | 0  | X     | /       | /   | /    | /     | /  |
| 1-345    | 3-7  | 6-6            | 4      | 0           | SRGRPY                   | 2      | 6    | 2    | 0     | α2  | k           | 3-20       | 1    | QQYGSFPWT    | 9       | 1              | 0  | /     | /       | /   | /    | /     | /  |
| 1-348    | 4-34 | 1-26           | 4      | 1           | GPDRAKQGY                | 2      | 9    | 17   | 0     | α1  | k           | 4-1        | 2    | QQYTYLPT     | 9       | 16             | 0  | /     | /       | /   | /    | /     | /  |
| 1-351    | 4-4  | 2-8/3-16       | 4      | 2           | GDRNGFFDY                | 1      | 9    | 23   | 1     | α1  | k           | 4-1        | 1    | QQYTYTPT     | 9       | 9              | 0  | /     | /       | /   | /    | /     | X  |
| 1-356    | 4-59 | 3-16           | 2      | 3           | DQVGGDWYFDL              | 0      | 11   | 21   | 1     | α1  | λ           | 1-44       | 3    | AAWDDLSLGHV  | 12      | 16             | 0  | /     | /       | /   | /    | /     | /  |
| 1-357    | 4-61 | 2-21           | 4      | 1           | WDAYCGGACYPSRPH          | 1      | 15   | 20   | 1     | α2  | k           | 3-20       | 1    | QQYGSFPWT    | 9       | 16             | 0  | /     | /       | /   | /    | /     | /  |
| 1-365    | 3-33 | 1-26           | 2      | 3           | GLWBERGFDL               | 1      | 10   | 8    | 0     | α1  | λ           | 2-14       | 3    | SSYVSSSTLWV  | 11      | 10             | 0  | /     | /       | /   | /    | /     | X  |
| 1-369    | 3-30 | 3-10/3-16      | 4      | 2           | DKGVRYFDY                | 2      | 9    | 19   | 0     | α2  | k           | 3-11       | 4    | QQRSNWPTT    | 9       | 4              | 0  | /     | /       | /   | /    | /     | /  |
| 1-384    | 4-59 | 2-15/2-21      | 4      | 2           | LYDPWFFDY                | 0      | 10   | 8    | 1     | α1  | k           | 3-20       | 4    | QQYDSSPQLT   | 10      | 3              | 0  | /     | /       | /   | /    | /     | /  |
| 1-392    | 3-53 | 1-7/1-20/1-1   | 3      | 1           | HAPMNNHALDI              | 2      | 11   | 12   | 0     | α2  | λ           | 1-40       | 1    | QSYDSSVLNGYV | 12      | 18             | 0  | /     | /       | /   | /    | /     | /  |
| 1-393    | 3-23 | 1-26           | 6      | 1           | PIVGAAGSANYGLDV          | 0      | 16   | 4    | 0     | α1  | k           | 3-15/3D-15 | 5    | QQYNNWPTT    | 10      | 7              | 0  | /     | /       | /   | /    | /     | /  |
| 1-396    | 3-9  | 6-19/6-25      | 4      | 3           | DILSWGYSSSSGDFYD         | 0      | 16   | 4    | 0     | α1  | λ           | 2-14       | 2/3  | SSYTSNTVTV   | 10      | 7              | 0  | /     | /       | /   | /    | /     | /  |

hd2 - IgA memory antibodies

| mAb name | VH   | DH           | JH (-) | Heavy chain |                  |        |      |      |       |     | Light chain |      |      |             |         | Polyreactivity |    |       |         |     |      |       |    |
|----------|------|--------------|--------|-------------|------------------|--------|------|------|-------|-----|-------------|------|------|-------------|---------|----------------|----|-------|---------|-----|------|-------|----|
|          |      |              |        | CDR3 (aa)   | (+)              | Length | Vmut | PNGS | α1/α2 | k/λ | Vk/λ        | Jk/λ | CDR3 | Length      | Vk/λmut | PNGS           | κH | dsDNA | Insulin | LPS | Poly | HEP-2 |    |
| 2-101    | 3-30 | 6-6          | 4      | 2           | DPFHIAARTPTFFDY  | 2      | 16   | 8    | 0     | α1  | λ           | 2-14 | 1    | SSYTSSTDFIV | 11      | 6              | 0  | /     | /       | /   | /    | /     | /  |
| 2-102    | 3-30 | 4-23         | 4      | 2           | DRSPHTQTYGNSVMDA | 2      | 17   | 14   | 0     | α1  | k           | 1-39 | 3    | QQSFNTPQT   | 9       | 13             | 0  | /     | /       | /   | /    | /     | /  |
| 2-103    | 1-2  | 1-1          | 5      | 1           | LIYTTSKLLGWFDV   | 1      | 14   | 32   | 0     | α1  | k           | 4-1  | 1    | QQYDTPPT    | 9       | 10             | 0  | X     | X       | X   | X    | X     | X  |
| 2-104    | 3-30 | 2-2/6-6/3-16 | 4      | 2           | EKLSRGLIRGYFDY   | 3      | 15   | 26   | 0     | α1  | k           | 3-20 | 1    | QQYGSFPWT   | 9       | 8              | 0  | ND    | ND      | ND  | ND   | ND    | ND |
| 2-110k   | 3-74 | 3-3/22       | 4      | 2           | DVSGSIDY         | 0      | 8    | 16   | 0     | α1  | k/λ         | 2-30 | 2    | MQGSHWPT    | 9       | 1              | 0  | /     | /       | /   | /    | /     | /  |
| 2-110A   |      |              |        |             |                  |        |      |      |       |     |             |      |      |             |         |                |    |       |         |     |      |       |    |
| 2-111    | 3-30 | 1-26         | 4      | 0           | GMGGILY          | 0      | 7    | 17   | 1     | α1  | λ           | 2-14 | 2/3  | QVWDDSSDHVV | 11      | 5              | 0  | /     | /       | /   | /    | /     | /  |
| 2-115    | 3-64 | 3-10/5-12    | 4      | 1           | VFGYNSGTRWRYFDY  | 1      | 16   | 25   | 0     | α2  | k           | 3-11 | 4    | ASYSDDNSVI  | 10      | 21             | 1  | ND    | ND      | ND  | ND   | ND    | ND |
| 2-120    |      |              |        |             |                  |        |      |      |       |     |             |      |      |             |         |                |    |       |         |     |      |       |    |





|        |      |               |   |   |                      |   |    |    |   |    |   |       |     |             |    |    |   |    |    |    |    |    |    |    |
|--------|------|---------------|---|---|----------------------|---|----|----|---|----|---|-------|-----|-------------|----|----|---|----|----|----|----|----|----|----|
| 4-165  | 3-23 | 6-19/-25/-13  | 4 | 2 | VWYSTQDY             | 0 | 9  | 25 | 0 | α2 | λ | 1-44  | 3   | AAWDDSLNVVW | 11 | 4  | 0 | /  | /  | /  | /  | /  | /  | /  |
| 4-166* | 3-72 | 5-12          | 3 | 1 | GYSVSVYAFDL          | 0 | 12 | 24 | 0 | α1 | κ | 1-17  | 1   | LQHNXPWT    | 9  | 0  | 0 | X  | X  | X  | X  | X  | X  | X  |
| 4-169  | 3-72 | 2-21          | 4 | 0 | ANSGN                | 0 | 5  | 8  | 0 | α2 | κ | 1-17  | 4   | LQHNXPWT    | 9  | 5  | 0 | ND |
| 4-170  | 4-39 | 2-2           | 4 | 1 | IPLCSTVSCYIGNFDY     | 0 | 16 | 5  | 1 | α1 | κ | 1-5   | 1   | QQYNSYRST   | 9  | 0  | 0 | X  | X  | X  | X  | X  | X  | X  |
| 4-174  | 3-23 | 5-24          | 4 | 2 | SRDVSRYGFYD          | 2 | 12 | 11 | 0 | α2 | κ | 3-15  | 4   | QHYDKWFLP   | 9  | 11 | 0 | X  | X  | X  | X  | X  | X  | X  |
| 4-175  | 3-23 | 3-10          | 6 | 2 | AGGSGPYTLEGGYFGLDV   | 0 | 18 | 31 | 0 | α2 | κ | 1-39  | 2   | QESYVVPYT   | 9  | 11 | 0 | ND |
| 4-176  | 4-39 | 6-6/-25/2-8   | 3 | 2 | LKIAFDADFV           | 1 | 10 | 19 | 1 | α1 | λ | 2-8   | 2/3 | SSYADNKRKRV | 9  | 11 | 0 | /  | /  | /  | /  | /  | /  | /  |
| 4-178  | 3-23 | 3-9/5/2-18    | 3 | 3 | DRVNHKLFDFGLDV       | 3 | 14 | 30 | 0 | α1 | κ | 1D-33 | 4   | QQSGSLPPLT  | 10 | 27 | 0 | /  | /  | /  | /  | /  | /  | /  |
| 4-180  | 1-2  | 6-6/2-8/-2    | 4 | 3 | DPVIVSDHFDY          | 1 | 12 | 26 | 0 | α2 | κ | 2-28  | 3   | MQSLRFPPT   | 9  | 18 | 0 | /  | /  | /  | /  | /  | /  | /  |
| 4-181  | 5-51 | 6-19/-13      | 5 | 1 | QQGYLAGSCHWFLD       | 1 | 15 | 30 | 0 | α2 | κ | 1-9   | 3   | QHLSSYPT    | 8  | 22 | 0 | ND |
| 4-183  | 3-7  | 3-9           | 4 | 2 | LPAIDWFLGGFDC        | 0 | 13 | 17 | 0 | α2 | κ | 3-11  | 1   | QHRLDWFWPT  | 9  | 14 | 0 | /  | /  | /  | /  | /  | /  | /  |
| 4-184  | 3-7  | 7-27          | 5 | 1 | ALGLFDP              | 0 | 7  | 12 | 0 | α1 | κ | 3-15  | 2   | QQYNNPFT    | 9  | 6  | 0 | /  | /  | /  | /  | /  | /  | /  |
| 4-187  | 5-51 | 3-10          | 3 | 3 | QDGGSHDAFDI          | 1 | 12 | 29 | 0 | α2 | κ | 3-15  | 2   | QQYNNPFT    | 10 | 18 | 1 | /  | /  | /  | /  | /  | /  | /  |
| 4-188  | 4-4  | 2-8/4-23      | 4 | 1 | NGKFSLEH             | 2 | 8  | 25 | 1 | α1 | κ | 3-20  | 2   | QRFSGEYPT   | 9  | 5  | 0 | X  | X  | X  | X  | X  | X  | X  |
| 4-192  | 4-39 | 6-19          | 4 | 1 | HAHGWVDY             | 3 | 9  | 29 | 1 | α2 | λ | 1-51  | 2/3 | ATWDSNLASHL | 11 | 18 | 1 | ND |
| 4-193  | 3-33 | 3-22          | 4 | 3 | DIYDSSGYRFDY         | 1 | 13 | 13 | 0 | α2 | κ | 3-20  | 1   | QQYSSSPRWT  | 10 | 4  | 0 | /  | /  | /  | /  | /  | /  | /  |
| 4-196  | 3-30 | 3-10          | 4 | 1 | DLYGSGSYHTGMVY       | 1 | 14 | 10 | 0 | α2 | λ | 2-14  | 3   | STYTTSSTWV  | 10 | 7  | 0 | /  | /  | /  | /  | /  | /  | /  |
| 4-203  | 3-9  | 3-3           | 6 | 2 | DRGNGFSGSLFVGHFNSLDA | 2 | 20 | 32 | 0 | α2 | κ | 1D-33 | 4   | QQYKRVPLT   | 9  | 29 | 0 | X  | X  | X  | X  | X  | X  | X  |
| 4-204  | 3-21 | 3-9           | 5 | 1 | YFEA                 | 4 | 4  | 9  | 0 | α1 | κ | 3-20  | 2   | QQYSSPFT    | 9  | 7  | 0 | /  | /  | /  | /  | /  | /  | /  |
| 4-205  | 3-48 | 7-27          | 3 | 2 | DLHWAFDI             | 1 | 8  | 17 | 0 | α1 | λ | 2-14  | 3   | SSPASI      | 6  | 7  | 0 | /  | /  | /  | /  | /  | /  | /  |
| 4-206  | 3-7  | 6-13          | 4 | 1 | SRVAVAGRYFDY         | 2 | 13 | 13 | 0 | α2 | κ | 4-1   | 3   | QQYVTSHH    | 8  | 7  | 0 | ND |
| 4-208  | 3-7  | 2-21/6-6/5-12 | 4 | 2 | VWGSYDLIEY           | 0 | 10 | 14 | 0 | α2 | κ | 3-11  | 4   | QHSST       | 5  | 12 | 0 | ND |
| 4-210  | 3-23 | 1-26          | 4 | 1 | GLNPSYGGYSHRVLDY     | 2 | 16 | 14 | 0 | α2 | κ | 3-15  | 4   | QQYINWPLT   | 9  | 4  | 0 | /  | /  | /  | /  | /  | /  | /  |
| 4-211  | 3-74 | 1-1           | 4 | 2 | DPGTGTSFRPFDY        | 1 | 12 | 3  | 0 | α1 | κ | 4-1   | 2   | QQYVTSPT    | 9  | 5  | 0 | /  | /  | /  | /  | /  | /  | /  |
| 4-212  | 5-51 | 2-21/4-17     | 4 | 5 | LLRNSDFDDFDY         | 1 | 13 | 16 | 0 | α2 | κ | 2-30  | 1   | MQGTHWPKT   | 9  | 4  | 0 | /  | /  | /  | /  | /  | /  | /  |
| 4-215  | 3-23 | 4-11/-4/2-21  | 4 | 4 | GAYDYHESIGLAFDD      | 1 | 16 | 25 | 0 | α1 | κ | 3-11  | 5   | QQRDSWPT    | 9  | 11 | 0 | /  | /  | /  | /  | /  | /  | /  |
| 4-216  | 3-7  | 1-7/1-20      | 5 | 1 | IGRNWPEA             | 1 | 10 | 15 | 0 | α2 | κ | 1-5   | 1   | QQHNDYLWT   | 9  | 7  | 0 | /  | /  | /  | /  | /  | /  | /  |
| 4-217  | 3-23 | 3-3/5-12      | 4 | 2 | VAGNNKCLDY           | 1 | 11 | 18 | 0 | α2 | κ | 3-15  | 2   | QQCNPWPT    | 9  | 5  | 0 | /  | /  | /  | /  | /  | /  | /  |
| 4-219* | 3-72 | 5-12          | 3 | 1 | GYSVSVYAFDI          | 0 | 12 | 13 | 0 | α1 | κ | 3-20  | 4   | QQYGRSPRT   | 9  | 7  | 0 | /  | /  | /  | /  | /  | /  | /  |
| 4-221  | 3-30 | 3-22          | 4 | 3 | DASGYIYDFYD          | 0 | 13 | 18 | 0 | α2 | κ | 4-1   | 3   | QQHNSPPT    | 9  | 18 | 0 | /  | /  | /  | /  | /  | /  | /  |
| 4-225  | 3-21 | 5-24/1-1      | 6 | 2 | GLYNRAEPPYFGMDV      | 1 | 16 | 23 | 0 | α2 | κ | 1-5   | 1   | QQYNNVPLT   | 9  | 22 | 0 | ND |
| 4-228  | 3-9  | 6-13          | 4 | 2 | GGNSNRQMSALPTELDH    | 2 | 18 | 15 | 0 | α1 | κ | 3-11  | 4   | QQRSATLT    | 8  | 3  | 0 | /  | /  | /  | /  | /  | /  | /  |
| 4-229  | 3-7  | 3-16          | 2 | 2 | RGKDLSPHSFFDL        | 3 | 13 | 23 | 0 | α2 | κ | 3-20  | 4   | QQYGGSPLT   | 9  | 8  | 0 | /  | /  | /  | /  | /  | /  | /  |
| 4-233  | 3-48 | 7-27/3-16     | 4 | 2 | FRGGGPFY             | 1 | 8  | 20 | 0 | α2 | κ | 1-9   | 4   | QHLSTFPRLT  | 11 | 13 | 0 | /  | /  | /  | /  | /  | /  | /  |
| 4-234  | 4-4  | 7-27          | 4 | 1 | VSTVTGPEYFPY         | 0 | 13 | 31 | 1 | α1 | κ | 4-1   | 4   | QQYIITPLT   | 9  | 13 | 0 | ND |
| 4-235  | 3-11 | 1-14          | 3 | 1 | GNRSPGASDI           | 1 | 10 | 15 | 1 | α1 | κ | 1-5   | 4   | QQYNSYPLT   | 9  | 9  | 0 | /  | /  | /  | /  | /  | /  | /  |
| 4-242  | 3-23 | -             | 4 | 2 | EKPYFD               | 1 | 6  | 26 | 0 | α2 | λ | 1-51  | 3   | GAWDSLRGRV  | 11 | 11 | 0 | /  | /  | /  | /  | /  | /  | /  |
| 4-243  | 3-7  | 6-6/3-16      | 6 | 2 | VRVGYDGMV            | 1 | 11 | 19 | 0 | α1 | κ | 1-5   | 4   | QQYNSG      | 6  | 6  | 0 | ND |
| 4-245  | 3-9  | 6-19          | 4 | 2 | GPPRLASELWLPAFFDF    | 1 | 17 | 33 | 0 | α1 | κ | 3-20  | 3   | QQYSSG      | 6  | 9  | 0 | ND |
| 4-247  | 3-23 | 5-12/-5/1-14  | 4 | 2 | TNQWMEGRYRFDY        | 1 | 15 | 20 | 0 | α2 | κ | 1-17  | 1   | LQHNXPFT    | 9  | 15 | 0 | /  | /  | /  | /  | /  | /  | /  |
| 4-252  | 4-39 | 3-16          | 5 | 3 | QHSDELWVNGYRPFDD     | 2 | 16 | 34 | 1 | α1 | λ | 2-8   | 2/3 | SSYPGRNTVVV | 11 | 14 | 0 | /  | /  | /  | /  | /  | /  | /  |
| 4-253  | 1-18 | 6-13          | 4 | 4 | EKGGDRSQWPELDY       | 2 | 14 | 22 | 0 | α1 | κ | 1D-33 | 2   | QQYDLSPLYT  | 9  | 14 | 0 | /  | /  | /  | /  | /  | /  | /  |
| 4-255  | 1-18 | 4-17/-23      | 4 | 1 | AGAAVTHPDS           | 1 | 11 | 16 | 0 | α1 | κ | 3-20  | 1   | QQYSSLWPT   | 9  | 6  | 0 | /  | /  | /  | /  | /  | /  | /  |
| 4-257  | 4-59 | 6-25/-19      | 4 | 2 | GERLGGDY             | 1 | 8  | 20 | 1 | α2 | κ | 2-30  | 1   | MQGTHWPT    | 9  | 13 | 0 | /  | /  | /  | /  | /  | /  | /  |
| 4-258  | 3-11 | 6-6           | 4 | 1 | LSGSSVEN             | 8 | 8  | 19 | 0 | α2 | κ | 2-30  | 4   | MQGTHWPLT   | 10 | 5  | 0 | /  | /  | /  | /  | /  | /  | /  |
| 4-260  | 3-7  | 3-10          | 3 | 2 | DRGQTFDL             | 1 | 9  | 24 | 0 | α2 | λ | 2-8   | 1   | GSYGGRI     | 8  | 11 | 0 | /  | /  | /  | /  | /  | /  | /  |
| 4-262  | 3-72 | 2-21          | 4 | 3 | TAYCGGGMCTEDYSEY     | 0 | 17 | 41 | 0 | α1 | κ | 1-5   | 4   | QQYQSPVT    | 9  | 22 | 0 | /  | /  | /  | /  | /  | /  | /  |
| 4-263  | 3-30 | 3-22          | 3 | 3 | ERYDRGGPSIGAAFDI     | 2 | 17 | 22 | 0 | α1 | λ | 2-14  | 1   | CSYKSGSSYV  | 10 | 15 | 0 | X  | X  | X  | X  | X  | X  | X  |
| 4-265  | 3-15 | 2-8           | 6 | 2 | EGYCTNSGSLVSGNSYGMV  | 0 | 22 | 18 | 0 | α1 | κ | 3-20  | 1   | QQYVTSPTWT  | 10 | 12 | 0 | ND |
| 4-266  | 3-74 | 3-9           | 6 | 2 | DWRVGLDV             | 1 | 8  | 17 | 0 | α1 | λ | 2-14  | 3   | SSYTTNSNV   | 10 | 12 | 0 | /  | /  | /  | /  | /  | /  | /  |
| 4-268  | 3-30 | 3-9           | 4 | 4 | DLQDQDLWLVGFDS       | 0 | 15 | 40 | 0 | α1 | κ | 3-11  | 2   | QQRSNWPLT   | 10 | 18 | 0 | /  | /  | /  | /  | /  | /  | /  |
| 4-269  | 3-23 | 2-21          | 6 | 4 | DLYSDCGADCYPKVDV     | 1 | 17 | 22 | 0 | α1 | κ | 1-17  | 4   | LQHHDFPLT   | 9  | 5  | 0 | /  | /  | /  | /  | /  | /  | /  |
| 4-273  | 3-74 | 5-24          | 4 | 3 | DGEGILPWFY           | 0 | 10 | 19 | 0 | α1 | κ | 3-15  | 1   | QQHNVWPT    | 9  | 9  | 0 | /  | /  | /  | /  | /  | /  | /  |
| 4-276  | 3-7  | 4-17          | 4 | 3 | GNPYGRVDFLQK         | 2 | 13 | 15 | 0 | α2 | κ | 2-28  | 2   | MQPVRTPYT   | 9  | 16 | 0 | ND |
| 4-277  | 4-31 | 5-5/-18/2-2   | 3 | 3 | EVNAPVTSDAFDI        | 0 | 13 | 25 | 0 | α1 | κ | 3-15  | 4   | QQYKRVPLT   | 9  | 7  | 0 | /  | /  | /  | /  | /  | /  | /  |
| 4-279  | 3-49 | 5-12/3-3/1-20 | 6 | 2 | ERFPYGMV             | 1 | 9  | 19 | 0 | α2 | κ | 4-1   | 1   | QQYGLIRT    | 9  | 14 | 0 | /  | /  | /  | /  | /  | /  | /  |
| 4-281  | 3-30 | 3-16/1-1      | 6 | 2 | DRQFQLQVRYGLDV       | 2 | 15 | 24 | 0 | α1 | λ | 2-23  | 1   | SSYVSLNTPYV | 11 | 30 | 0 | /  | /  | /  | /  | /  | /  | /  |
| 4-282  | 3-9  | 2-21          | 2 | 2 | ASESYCSGDCPRFWYFAL   | 1 | 17 | 22 | 0 | α1 | κ | 4-1   | 1   | QQYFTPLA    | 11 | 10 | 0 | /  | /  | /  | /  | /  | /  | /  |
| 4-283  | 3-48 | 2-21          | 4 | 2 | GWDRSHGDY            | 2 | 10 | 10 | 0 | α2 | κ | 2-30  | 1   | MDGSRWT     | 7  | 8  | 0 | /  | /  | /  | /  | /  | /  | /  |
| 4-284  | 1-3  | 3-16/-22      | 3 | 2 | GAAGRVSDDGGGSYDI     | 1 | 16 | 22 | 0 | α2 | κ | 4-1   | 1   | QQYVSPWPT   | 9  | 14 | 0 | ND |
| 4-286  | 3-21 | 4-17          | 4 | 2 | GTNGDYD              | 0 | 8  | 3  | 0 | α2 | κ | 1-17  | 1   | LQNNYRPT    | 9  | 4  | 1 | /  | /  | /  | /  | /  | /  | /  |
| 4-289  | 3-30 | 5-12          | 3 | 3 | SSAGDYAFDI           | 0 | 11 | 3  | 0 | α2 | κ | 2-28  | 1   | MQALQTPRT   | 9  | 5  | 0 | /  | /  | /  | /  | /  | /  | /  |
| 4-293  | 3-30 | 3-22          | 4 | 3 | DPSWFYETSSAYFDY      | 0 | 16 | 12 | 0 | α1 | λ | 1-51  | 3   | GTWDSLSVGV  | 11 | 10 | 0 | /  | /  | /  | /  | /  | /  | /  |
| 4-294* | 3-72 | 5-12          | 3 | 1 | GYSVSVYAFDL          | 0 | 12 | 19 | 0 | α2 | κ | 3-20  | 4   | QQYATSPRT   | 9  | 21 | 0 | ND |
| 4-295  | 3-23 | 1-1           | 5 | 2 | AGTSLDQIFTD          | 0 | 11 | 32 | 0 | α2 | κ | 3-11  | 5   | QQRYSWPPLT  | 10 | 11 | 0 | ND |

#### hd2 - IgG memory antibodies

| mAb name | VH   | DH       | JH (-) | Heavy chain |                |       |      | Light chain |     |      |      | Polyreactivity |        |            |      |     |       |         |     |      |       |   |   |
|----------|------|----------|--------|-------------|----------------|-------|------|-------------|-----|------|------|----------------|--------|------------|------|-----|-------|---------|-----|------|-------|---|---|
|          |      |          |        | CDR3 (aa)   | (+) Length     | VHmut | PNGS | γ1-γ4       | κ/λ | Vκ/λ | Jκ/λ | CDR3           | Length | Vκ/λmut    | PNGS | κLH | dsDNA | Insulin | LPS | Poly | Hep-2 |   |   |
| 2-106    | 1-46 | 1-1/5-24 | 4      | 3           | DGQLEPADY      | 0     | 9    | 24          | 1   | γ3   | κ    | 3-11           | 3      | QRHYDWLET  | 9    | 13  | 0     | /       | /   | /    | /     | / | / |
| 2-107    | 4-39 | 5-24     | 4      | 2           | WERGTIRDY      | 2     | 9    | 22          | 1   | γ2   | λ    | 2-11           | 1      | CSYAGTYAEV | 10   | 12  | 0     | /       | /   | /    | /     | / | / |
| 2-108    | 3-9  | 6-19     | 3      | 2           | ERSVAVAGPRSFDI | 2     | 14   | 16          | 1   | γ1   | λ    | 2-11           | 1      | CSYAGGFNLV | 10   | 12  | 0     |         |     |      |       |   |   |



|       |         |                |   |   |                     |   |    |    |   |    |   |             |     |              |    |    |   |    |    |    |    |    |    |    |
|-------|---------|----------------|---|---|---------------------|---|----|----|---|----|---|-------------|-----|--------------|----|----|---|----|----|----|----|----|----|----|
| 4-141 | 3-11    | 3-10           | 6 | 2 | GTMRGVDDYYGMDV      | 1 | 15 | 12 | 0 | γ2 | κ | 3-15        | 2   | QQYNNWLYT    | 9  | 7  | 0 | /  | /  | /  | /  | /  | /  | X  |
| 4-145 | 3-7     | 3-16           | 4 | 0 | WGALGSL             | 0 | 7  | 18 | 1 | γ2 | κ | 2-30        | 2   | MQRTHWPHT    | 9  | 14 | 0 | ND |
| 4-147 | 3-30    | 6-19/4-11/4-4  | 5 | 2 | DAVAPATVGVLYNWFDV   | 0 | 17 | 18 | 0 | γ2 | κ | 3-15        | 4   | QQHNDWPLT    | 9  | 9  | 0 | /  | /  | /  | /  | /  | /  | /  |
| 4-152 | 3-15    | 3-10           | 5 | 1 | DRGVQWRPLFAT        | 2 | 12 | 30 | 0 | γ2 | κ | 1D-39 / 1-3 | 2   | QQSYSTPPYT   | 10 | 24 | 0 | ND |
| 4-155 | 3-11    | 3-3            | 6 | 2 | GSPYDFWGYRPHGMDV    | 1 | 17 | 8  | 0 | γ1 | λ | 2-8         | 2/3 | SSFAGSIGV    | 9  | 6  | 0 | /  | /  | /  | /  | /  | /  | /  |
| 4-156 | 3-23    | 1-26           | 4 | 2 | LGGGDSWRLELTH       | 2 | 12 | 26 | 0 | γ1 | κ | 4-1         | 5   | QQYYSAP      | 7  | 10 | 0 | ND |
| 4-162 | 3-23    | 3-3/3-16/3-9   | 5 | 1 | GGHLKNWLEDP         | 2 | 10 | 23 | 0 | γ2 | λ | 2-14        | 1   | SSYTKTSRYV   | 11 | 14 | 0 | /  | /  | /  | /  | /  | /  | /  |
| 4-166 | 3-30    | 3-10           | 4 | 2 | TLRRGQFGEFQTPFDV    | 2 | 16 | 6  | 0 | γ2 | κ | 1D-39 / 1-3 | 4   | QQSYRTHS     | 8  | 3  | 0 | /  | /  | /  | /  | /  | /  | X  |
| 4-172 | 3-23    | 3-16           | 6 | 2 | GYSGTNIILGDYQYYGMDV | 0 | 21 | 9  | 0 | γ1 | κ | 1D-8        | 1   | QQYHSFPWT    | 9  | 15 | 0 | X  | X  | X  | X  | X  | X  | /  |
| 4-175 | 4-34    | 6-19/6-25/6-13 | 5 | 1 | LRGGYSSGWRHLSWFDV   | 3 | 16 | 24 | 2 | γ1 | λ | 1-40        | 2/3 | QSYDSSLGVL   | 11 | 14 | 0 | /  | /  | /  | X  | /  | /  | /  |
| 4-176 | 4-61    | 3-3            | 2 | 1 | NNVGSYGSGYFDEL      | 0 | 14 | 29 | 1 | γ1 | λ | 3-21        | 1   | QVWESLNDHYV  | 11 | 21 | 0 | /  | /  | /  | /  | /  | /  | /  |
| 4-178 | 3-30-3  | 3-3            | 5 | 2 | QFATYYDFWGSIGALDT   | 0 | 19 | 28 | 0 | γ3 | κ | 3-20        | 2   | QQYSSPYT     | 9  | 7  | 0 | ND |
| 4-182 | 3-48    | 3-3/3-16/3-9   | 3 | 2 | ESLRGFDI            | 1 | 8  | 5  | 0 | γ2 | κ | 1-5         | 1   | QQYNNYPTWT   | 10 | 3  | 0 | /  | /  | /  | /  | /  | /  | /  |
| 4-188 | 5-51    | 1-26           | 3 | 1 | PRIVGARVYAAFDV      | 2 | 13 | 23 | 0 | γ1 | κ | 3-11        | 3   | QQGNNWPLT    | 9  | 12 | 0 | /  | /  | /  | /  | /  | /  | X  |
| 4-191 | 3-48    | 6-6            | 6 | 2 | GGTWRVYGMVDV        | 1 | 12 | 14 | 0 | γ2 | λ | 1-44        | 2/3 | AVWDDSLTGRVV | 12 | 13 | 0 | /  | /  | /  | /  | /  | /  | /  |
| 4-192 | 3-30/-3 | 3-22           | 4 | 2 | PNYNYDSLTPFDS       | 0 | 14 | 16 | 0 | γ1 | κ | 1-5         | 1   | QQYDRWYT     | 8  | 12 | 0 | ND |
| 4-195 | 3-30/-3 | 7-27/3-9       | 6 | 2 | GGSDWGLNSYHGMDV     | 1 | 15 | 32 | 0 | γ3 | κ | 1D-39 / 1-3 | 1   | QQSYGLLWT    | 9  | 25 | 0 | X  | X  | X  | X  | X  | X  | X  |

(-) and (+) indicate the numbers of negatively and positively charged aminoacids in the IgH complementary determining region (CDR3), respectively. VHmut and Vc/7mut indicate the total number of mutations in the VH and VL Ig genes. PNGS, number of putative N-glycosylation sites (N(X)S/T).

Poly, polyreactivity. X, reactive; /, non reactive.

**Supporting Information Table 2. Gene features and reactivity of germline-reverted IgA+ memory B-cell antibodies.**

| mAb name | Heavy chain |               |    |        |                     |                     |        |     |            |      | Light chain |             |                    |        | Reactivity |       |       |       |          |      |
|----------|-------------|---------------|----|--------|---------------------|---------------------|--------|-----|------------|------|-------------|-------------|--------------------|--------|------------|-------|-------|-------|----------|------|
|          | VH          | DH            | JH | VH-mut | CDR3 (aa)           | Reverted CDR3 (aa)  | Length | κ/λ | Vκ/λ       | Jκ/λ | VL-mut      | CDR3 (aa)   | Reverted CDR3 (aa) | Length | Mutated    |       |       |       | Reverted |      |
|          |             |               |    |        |                     |                     |        |     |            |      |             |             |                    |        | Poly       | Hep-2 | ELISA | HEp-2 | IFA      | Poly |
| 1-170λ   | 3-23        | 3-3           | 6  | 19     | WALLEWVFDGMDV       | WALLEWVFDGMDV       | 13     | λ   | 1-47       | 3    | 7           | QSYDDSLGSWV | QSYDDSLGSWV        | 11     | X          | X     | X     | /     | /        | /    |
| 1-239    | 3-74        | 1-26          | 5  | 22     | GGTPGA              | GGTPGA              | 6      | k   | 3-15       | 2    | 7           | QQYNDWPTY   | QQYNNWPTY          | 9      | X          | X     | X     | /     | /        | /    |
| 2-215    | 1-2         | 2-15          | 4  | 18     | THGGYCSGGTCYGTWTFDY | THGGYCSGGTCYGTWTFDY | 19     | k   | 1-17       | 5    | 10          | LQHNSYPLT   | LQHNSYPLT          | 7      | X          | X     | X     | /     | X        | /    |
| 2-225    | 3-66        | 6-6/-19/-25   | 2  | 12     | NKNIAGNAWGGNWFYFDL  | NKNIAGNAWGGNWFYFDL  | 17     | λ   | 2-8        | 2/3  | 9           | SSYAGSRMV   | SSYAGSRMV          | 9      | X          | X     | X     | /     | /        | /    |
| 2-239    | 4-39        | 3-3           | 4  | 17     | ERDFWTGYWPDQ        | ERDFWSGYWPDQ        | 12     | k   | 1-17       | 1    | 13          | LQHSHPWT    | LQHNSYPWT          | 9      | X          | X     | X     | /     | /        | /    |
| 3-165    | 3-74        | 6-19/1-1/6-13 | 4  | 40     | ESLPTGTRYFEY        | ESLPTGTRYFDY        | 12     | k   | 3-15       | 3    | 15          | HQYNSWPVT   | QQYNNWPVT          | 9      | X          | X     | X     | /     | /        | /    |
| 3-292    | 3-33        | 3-16          | 4  | 15     | EIFSFGGLIARYFDN     | EIFSFGGVIARYFDY     | 15     | k   | 1-39/1D-39 | 2    | 11          | QOSYGTPTY   | QOSYSTPTY          | 9      | X          | X     | X     | /     | X        | /    |
| 4-170    | 4-39        | 2-2           | 4  | 5      | IPLCSVTSCYIGNFDY    | IPLCSVTSCYIGNFDY    | 16     | k   | 1-5        | 1    | 0           | QQYNSYSRT   | QQSYSTPTY          | 9      | X          | X     | X     | X     | X        | X    |
| 4-263    | 3-30        | 3-22          | 3  | 22     | ERYDRGGPSIGAADI     | ERYDRGGPSIGAADI     | 17     | λ   | 2-14       | 1    | 15          | CSYKSGSSYV  | SSYTSSTTYV         | 10     | X          | X     | X     | /     | /        | /    |

(-) and (+) indicate the numbers of negatively and positively charged aminoacids in the IgH complementary determining region (CDR3), respectively. VHmut and Vκ/λmut indicate the total number of mutations in the VH and VL Ig genes. Poly., polyreactivity. X, reactive; /, non reactive.
